# Supplementary material for: Socioeconomic differences in diet composition of the adult population in southern Brazil: a population-based study
Source: Springer Nature journal article supplement (doi:10.1007/s10389-017-0818-z), 2017-07-03
Supplement: MOESM2 [file 12669854]

**Supplementary table 2 – Description of the crude and adjusted mean values of intake ​​for monounsaturated, saturated, polyunsaturated, cholesterol and trans fats according to sex and per capita income among adults aged 22 to 63 years. Florianópolis - Brazil, 2012.**

|  | | **Monounsaturated (grams)** | | **Saturated (grams)** | | **Polyunsaturated (grams)** | | **Cholesterol (milligrams)** | | **Trans (grams)** | |
| --- | --- | --- | --- | --- | --- | --- | --- | --- | --- | --- | --- |
| **Sex and per capita income** | **N** | Crude mean  (SE) | Adjusted  a mean  (SE) | Crude mean  (SE) | Adjusted a mean  (SE) | Crude mean  (SE) | Adjusted a mean  (SE) | Crude mean  (SE) | Adjusted a mean  (SE) | Crude mean  (SE) | Adjusted a mean  (SE) |
| **Women** | 681 | **23.2**  **(0.2)** |  | **20.1**  **(0.2)** |  | **15.4**  **(0.2)** |  | **256.6**  **(3.4)** |  | **3.4**  **(2.0)** |  |
| 1st tertile | 244 | 21.7  (0.3) | 21.5  (0.3) | 18.7  (0.4) | 18.5  (0.4) | 14.7  (0.2) | 14.5  (0.2) | 242.6  (3.9) | 240.8  (4.0) | 3.6  (0.1) | 3.6  (0.1) |
| 2nd tertile | 211 | 23.5  (0.5) | 23.5  (0.5) | 20.2  (0.4) | 20.2  (0.4) | 15.7  (0.4) | 15.8  (0.4) | 252.5 (4.5) | 253.0  (4.6) | 3.4  (0.1) | 3.5  (0.1) |
| 3rd tertile | 226 | 24.3  (0.6) | 24.5  (0.6) | 21.2  (0.5) | 21.3  (0.4) | 15.7  (0.4) | 15.8  (0.4) | 272.2 (5.2) | 273.5  (5.0) | 3.3  (0.2) | 3.3  (0.3) |
| **P value** |  | **<0.001**b | **<0.001**b | **<0.001**b | **<0.001**b | **0.050** | **0.029** | **<0.001**b | **<0.001**b | **0.221**b | **0.234**b |
| **Men** | 512 | **26.9**  **(0.4)** |  | **23.5**  **(0.4)** |  | **17.6**  **(0.3)** |  | **294.9**  **(4.8)** |  | **3.0**  **(2.0)** |  |
| 1st tertile | 176 | 26.2  (0.6) | 26.4  (0.6) | 22.1  (0.7) | 22.3  (0.7) | 18.3  (0.5) | 18.3  (0.4) | 281.8  (8.4) | 283.8  (8.2) | 2.8  (0.2) | 2.8  (0.2) |
| 2nd tertile | 169 | 27.3  (0.6) | 27.4  (0.6) | 24.3  (0.5) | 24.4  (0.5) | 17.9  (0.5) | 18.0  (0.5) | 289.3  (6.1) | 289.6  (6.0) | 2.8  (0.2) | 2.8  (0.2) |
| 3rd tertile | 167 | 27.1  (0.7) | 26.9  (0.6) | 24.2  (0.7) | 23.9  (0.7) | 16.7  (0.4) | 16.5  (0.4) | 307.5 (8.7) | 305.5  (8.3) | 3.3  (0.1) | 3.3  (0.1) |
| **P value** |  | **0.492** | **0.470** | **0.060** | **0.067** | **0.009**b | **0.002**b | **0.037** b | **0.066**b | **0.474** | **0.430** |

a Adjusted for age, marital status and skin color

bLinear Trend Test
