# Supplementary material for: Socioeconomic differences in diet composition of the adult population in southern Brazil: a population-based study
Source: Springer Nature journal article supplement (doi:10.1007/s10389-017-0818-z), 2017-07-03
Supplement: MOESM3 [file 12669854]

**Supplementary table 3 - Description of the adequacy of nutrients analyzed according to sex and per capita income among adults aged 22 to 63 years. Florianópolis - Brazil, 2012.**

| **Prevalence ratio of adequacy according to per capita income** | | | | | | | | | | | | | | | | |
| --- | --- | --- | --- | --- | --- | --- | --- | --- | --- | --- | --- | --- | --- | --- | --- | --- |
|  | | **Women** | | | | | | **Men** | | | | | | | | |
| **Crude** | | | **Adjusted** d | | | **Crude** | | | **Adjusted** d | | | | | |
| **Nutrient** | **Recommendation** | **1st tertil** | **2nd tertil** | **P value** c | **1st tertil** | **2nd tertil** | **P value** c | **1st tertil** | **2nd tertil** | **P value** c | **1st tertil** | | **2nd tertil** | | | **P value** c |
| Carbohydrates | 45-65%a | 1.12 | 1.10 | 0.107 | 1.12 | 1.11 | 0.098 | 1.13 | 1.01 | 0.262 | | 1.11 | | 1.01 | 0.331 | |
| Proteins | 10-35% a | 1.01 | 1.00 | 0.374 | 1.01 | 1.00 | 0.432 | 0.99 | 1.00 | 0.248 | | 0.99 | | 1.00 | 0.255 | |
| Lipids | 20-35% a | 0.99 | 0.98 | 0.873 | 0.99 | 0.97 | 0.841 | 0.98 | 0.98 | 0.944 | | 0.97 | | 0.97 | 0.859 | |
| Saturated | <10%b | 1.25 | 1.11 | 0.334 | 1.30 | 1.12 | 0.231 | 1.54 | 0.89 | 0.001 | | 1.49 | | 0.86 | 0.001 | |
| Monounsaturated | 15-20%b | 0.78 | 0.71 | 0.196 | 0.79 | 0.68 | 0.184 | 0.73 | 1.11 | 0.354 | | 0.73 | | 1.12 | 0.321 | |
| Polyunsaturated | 6-10%b | 1.03 | 0.98 | 0.353 | 1.03 | 0.98 | 0.287 | 1.19 | 1.08 | 0.100 | | 1.18 | | 1.09 | 0.141 | |
| Trans | <1%b | 0.88 | 0.95 | 0.836 | 0.85 | 0.93 | 0.759 | 1.39 | 1.16 | 0.157 | | 1.44 | | 1.20 | 0.091 | |
| Cholesterol | <300mgb | 1.16 | 1.07 | 0.002 | 1.19 | 1.08 | 0.001 | 1.26 | 1.18 | 0.092 | | 1.21 | | 1.16 | 0.124 | |
| Fiber | >25g/dayb | 0.60 | 1.41 | 0.046 | 0.61 | 1.45 | 0.059 | 0.85 | 1.00 | 0.693 | | 0.83 | | 1.02 | 0.626 | |

a AMDR reference

bWHO (2003) reference

c Reference group: 3rd tertile of per capita income

d Adjusted for age, marital status and skin color

Institute of Medicine (2005) Dietary Reference Intakes for Energy, Carbohydrate, Fiber, Fat, Fatty Acids, Cholesterol, Protein, and Amino Acids (Macronutrients). Dietary Reference Intakes for Water, Potassium, Sodium, Chloride, and Sulfate, <http://publications.gc.ca/site/eng/278308/publication.html>. Accessed November 06, 2015.

World Health Organization (2003) Technical Report Series. Diet, nutrition and the prevention of chronic diseases: report of a joint WHO/FAO expert consultation. WHO technical report series; 916 Geneva
